# Supplementary material for: Empirical prediction for travel distance of channelized rock avalanches in the Wenchuan earthquake area
Source: Copernicus journal article supplement (doi:10.5194/nhess-2016-372), 2016-12-02
Supplement: Supplementary file [file nhess-2016-372-RC2-supplement.pdf]

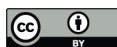

# **Empirical prediction for travel distance of channelized rock avalanches in the Wenchuan earthquake area**

Weiwei Zhan, Xuanmei Fan, Runqiu Huang, Xiangjun Pei, Qiang Xu, Weile Li

State Key Laboratory of Geohazard Prevention and Geoenvironment Protection, Chengdu University of Technology, Chengdu, 610059, China

Correspondence to: Xuanmei Fan ([fxm\\_cdut@qq.com](mailto:fxm_cdut@qq.com))

**Abstract.** Rock avalanches are extremely rapid, massive flow-like movements of fragmented rock. The travel path of the rock avalanches may be confined by channels in some cases, which were named as the channelized rock avalanches. Channelized rock avalanches are potentially dangerous due to their hardly predictable travel distance. In this study, we constructed a dataset with detailed characteristic parameters of 38 channelized rock avalanches triggered by the 2008 Wenchuan earthquake using the visual interpretation of remote sensing imagery, field investigation, and literature review. Based on this dataset, we assessed the influence of different factors on the runout distance and developed prediction models of the channelized rock avalanches using the multivariate regression method. The results suggested that the movement of channelized rock avalanche was dominated by the landslide volume, total relief, and channel gradient. The performance of both models was then tested with an independent validation dataset of 8 rock avalanches that induced by the 2008 Wenchuan, the Ms7.0 Lushan earthquake, and heavy rainfall in 2013, showing acceptable good prediction results. Therefore, the travel distance prediction models for channelized rock avalanches constructed in this study is applicable and reliable for predicting the run out of similar rock avalanches in other regions.

**Keywords:** channelized rock avalanches; travel distance; empirical prediction; multivariate regression model; Wenchuan earthquake

## **1 Introduction**

Rock avalanches are extremely rapid, massive flow-like movements of fragmented rock from a very large rock slide or rock fall (Hogg et al. 2014). Hundreds of rapid and long run-out rock avalanches were triggered by 2008 Wenchuan earthquake in Sichuan Province (Zhang et al. 2013), with

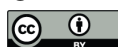

30 catastrophic consequences for residents in the affected areas. For instance, the  $1.5 \times 10^7 \text{ m}^3$  Donghekou  
 31 rock avalanche in Qingchuan County, near the seismogenic fault, traveled 2.4 km, killing about 780  
 32 persons and destroying four villages (Zhang et al. 2013). Rock avalanches can cause incredible damage  
 33 due to their characteristics of high-speed and unexpectedly long runout, while their transport  
 34 mechanisms are still considered to be controversial among many researchers (Hungr et al. 2001).  
 35 Therefore, constructing prediction models for rock-avalanche travel distance is meaningful in terms of  
 36 not only theoretical research on motion mechanisms but also in practical application for mitigation of  
 37 rock-avalanche risk.

38 Methods for determining the travel distance of landslides can be divided into two categories: dynamic  
 39 modeling (Heim 1932; Hungr et al. 2009; Lo et al. 2011; Pastor et al. 2009; Sassa 1988), and empirical  
 40 modeling (Scheidegger 1973; Lied et al 1980; Finlay et al. 1999; W  et al. 2006; Guo et al. 2014).  
 41 The dynamic models provide information on landslide intensity, such as velocity, affected area and  
 42 deposition depth, in addition to travel distance. Nonetheless, dynamic models require accurately  
 43 quantified input parameters that are difficult to obtain before the events, and many simplified  
 44 assumptions that are not applicable to the actual situation. Empirical models considering the  
 45 correlations between observational data provide an effective technique to aid in understanding  
 46 mechanisms of rock-avalanche motion and to develop practical models for predicting rock-avalanche  
 47 travel distance. However, the empirical-statistical models set up from samples with different  
 48 geomorphological and geological surroundings, trigger conditions, or failure modes are not very  
 49 sufficient to be applied to Wenchuan earthquake area .

50 In this study, we compiled a dataset of 38 rock avalanches with flow paths confined by channels (this  
 51 kind of landslide is hereinafter termed as channelized rock avalanche) from interpretation of remote  
 52 sensing, field investigations and literature review (see Section 3.1). Statistical correlations were used to  
 53 determine the principle factors affecting the mobility of the channelized rock avalanches. Then a  
 54 stepwise multivariate regression model was developed to build a best-fit empirical model for the travel-  
 55 distance prediction of this kind of rock avalanches in the Wenchuan earthquake area. A derivative  
 56 multivariate regression model was also constructed. The performance of both models was then tested  
 57 with an independent validation dataset of 8 rock avalanches in the same area.

58



## 59 2 Rock avalanches in study area

60 The study area (see Figure 1) is on the northeast-trending Longmenshan thrust fault zone between the  
 61 Sichuan basin and the Tibetan plateau. Three major sub-parallel faults are: the Wenchuan-Maowen  
 62 fault, the Yingxiu-Beichuan fault and the Pengguan fault (Fan et al., 2014). With highly developed  
 63 stream systems, this region is characterized by high mountains and deep valleys and extreme rates of  
 64 erosion (Fu et al 2009; Qi et al 2011).

65 This study selected 38 channelized rock avalanches induced by the Wenchuan earthquake to study the  
 66 relations between travel distance and influential factors. These rock avalanches occurred along the  
 67 seismogenic Yingxiu-Beichuan fault; the distance to the fault ranged from 0 m ~21,300 m with a mean  
 68 value of 3,895 m. Another distribution characteristic was that these rock avalanches mainly clustered  
 69 on the step-overs, bends and distal ends of the seismogenic fault. These distribution characteristics of  
 70 the large rock avalanches suggested that the occurrence of rock avalanches was associated with very  
 71 strong earthquake ground motion. The Wolong Station recorded the highest seismic acceleration with  
 72 the peak ground acceleration reaching 0.948g vertically and 0.958g horizontally (Yu et al., 2009).  
 73 Locally, the ground motion was high enough to throw rocks into the air.

74 The lithology of outcropping rock in source areas can be divided to four types: carbonate rock, phyllite,  
 75 igneous rock and sandstone. The landslide deposit of the rock avalanches in the study area structure  
 76 was usually debris, which suggests that the sliding masses were intensively fragmented during their  
 77 movement.

78 The influence of the local geomorphology on the paths of the rock avalanches was obtained from  
 79 remote-sensing images after the events. Although the rock avalanches we chose all had flow paths  
 80 confined by channels, some topographic differences were found to be significant in affecting present  
 81 that had affected the shape morphology of the rock avalanche deposits. The source areas had well-  
 82 defined boundaries. When the source mass was detached from the slide bedrock, it may directly  
 83 move into the channel down slope (see Figure 2b), or access the channel with enter it at some impact  
 84 transition angle of movement direction (see Figure 2a). The channel itself may have changes in  
 85 direction and inclination. The distal end of the landslide may lie stop in the channel (see Figure 2a) or  
 86 may reach the valley or plain (see Figure 2b).

87

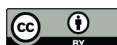

88 The study area (see Figure 1) is on the northeast-trending Longmenshan thrust fault zone between the  
 89 Sichuan basin and the Tibetan plateau. Three major sub-parallel faults are: the Wenchuan-Maowen  
 90 fault, the Yingxiu-Beichuan fault and the Pengguan fault (Wang et al., 2014). With highly developed  
 91 stream systems, this region is characterized by high mountains and deep valleys and extreme rates of  
 92 erosion (Fu et al 2009; Qi et al 2011).

93 This study selected 38 channelized rock avalanches induced by the Wenchuan earthquake to study the  
 94 relations between travel distance and influential factors. These rock avalanches occurred along the  
 95 seismogenic Yingxiu-Beichuan fault; the distance to the fault ranged from 0 m ~21,300 m with a mean  
 96 value of 3,895 m. Another distribution characteristic is that these rock avalanches mainly clustered on  
 97 the step-overs, bends and distal ends of the seismogenic fault. These distribution characteristics of the  
 98 large rock avalanches suggested that the occurrence of rock avalanches was associated with very strong  
 99 earthquake ground motion. The Wolong Station recorded the highest seismic acceleration with the peak  
 100 ground acceleration reaching 0.948g vertically and 0.958g horizontally (Yu et al., 2009). Locally, the  
 101 ground motion was high enough to throw rocks into the air.

102 The lithology of outcropping rock in source areas can be divided to four types: carbonate rock, phyllite,  
 103 igneous rock and sandstone. The deposit of the rock avalanches in the study area is usually debris,  
 104 which suggests that the sliding masses were intensively fragmented during their movement.

105 The influence of the local geomorphology on the paths of the rock avalanches was obtained from  
 106 remote-sensing images after the events. Although the rock avalanches we chose all had flow paths  
 107 confined by channels, some topographic differences were found to be significant in affecting the  
 108 morphology of the rock avalanche deposits. When the source mass was detached from the bedrock, it  
 109 may directly move into the channel down slope (see Figure 2b), or enter the channel with some  
 110 transition angle of movement direction (see Figure 2a). The channel itself may have changes in  
 111 direction and inclination. The distal end of the landslide may stop in the channel (see Figure 2a) or may  
 112 reach to wide valley or plain (see Figure 2b).

113



### 114 3 Data and method

#### 115 3.1 General consideration

116 Various statistical methods have been applied to predict travel distance of landslides. The most  
 117 prevalent one is the equivalent friction coefficient model, which only takes account of landslide volume  
 118 (Scheidegger 1973). Another well-known model is the statistical  $\alpha$ - $\beta$  model in which the maximum  
 119 runout distance is solely a function of geography  et al., 1980; Gauer et al., 2010). Finlay et  
 120 al.(1999) developed some multiple regression models containing slope geometric parameters like slope  
 121 height and slope angle for the travel distance prediction of landslides on the artificial slopes upon the  
 122 horizontal surface. Based on the data of 54 landslides which was relatively open or confined by gentle  
 123 lateral slope, Guo et al.(2014) established an empirical model for predicting landslide travel distance in  
 124 Wenchuan earthquake area and suggested that rock type, landslide volume, and slope transition angle  
 125 play dominant roles on landslide travel distance. And there are increasing sound that the prediction  
 126 models of travel distance should adapt to different types of landslides (Corominas 1996; Fan et al,  
 127 2014;). 

128 Moreover, the local morphology plays an important role on shape and mobility of rock avalanches.  
 129 Heim (1932) firstly mentioned the influence of local morphology that the debris masses will undergo  
 130 different effects with the angle of impact changing, and rock avalanches has to conform to the local  
 131 morphology regardless of their scale. Abele (1974) summarized four different possibilities of  
 132 adaptation of the rock avalanche to local morphology. Hsu(1975) noted that a sinuous pathway can  
 133 reduced runout distance of rock avalanches. Nicoletti (1991) inferred that local morphology impacts on  
 134 landslide motion through changing the rate of total energy dissipation along the travel path. To  
 135 determine the influence of specific channels on the travel distances of rock avalanches, we respectively  
 136 consider the impacts of gradients of the upper slopes and lower channels.

137 Rock avalanches triggered by Wenchuan earthquake usually initiated from top or the higher part of  
 138 slopes possibly due to the altitude amplification effect of earthquake acceleration, therefore the toe of   
 139 the rupture surface were commonly found in the source area at the upstream of the channel (See Figure  
 140 3). When the slope failed, the failed mass travelled a long distance down the channel. The 38 rock  
 141 avalanches in this study are selected with the criterion that the flow path is partially or fully confined  
 142 by channels. The volumes of these rock avalanches ranged from  $0.4\text{--}50 \times 10^6 \text{m}^3$ ; with horizontal travel



143 distances between 0.58 and 4.00 km. The volume is prior to the area to be put into the travel distance  
 144 prediction model as it had much more physical meanings. And we introduced total relief as well as the  
 145 height of source area to probe the influences of the potential energy difference and altitude difference  
 146 of source mass on the travel distance of the rock avalanches.

### 147 3.2 Data

148 The terms and notations of a typical channelized rock avalanche are shown in Figure 3. The local  
 149 morphology of a rock avalanche can be divided to three sections: initiated slope (source area), channel  
 150 (main travel path or flow area) and valley floor (deposition area). When the mass moves over the slope  
 151 section, it is free from lateral constraints, and the moving mass is able to spread laterally. After entering  
 152 the channel, the flowing mass is constrained by the two lateral slopes. Finally, the mass may reach to a  
 153 wide valley floor, where it spreads laterally and deposits. The average inclination of slope section and  
 154 valley section are obtained respectively, while the gradient of valley section is neglected as it has very  
 155 little variation. Slope angle ( $\alpha$ ), denotes the average inclination of the initiated slope section.  
 156 Channel angle ( $\beta$ ), denotes the average inclination of the sectional channel. Source area height (Hs),  
 157 denotes the elevation difference between the crest of the sliding source and the toe of the rupture  
 158 surface. Total relief (H) is the elevation difference between the crest of the sliding source and the distal  
 159 end of the debris deposit. Travel distance (L) is the horizontal distance between the crest of the sliding  
 160 source and the distal end of the debris deposit. Landslide area (A) is the source area of the rock  
 161 avalanche obtained from remote sensing image interpretation. An empirical scaling relationship with  
 162 different empirical coefficients is frequently used to link the volume and the area of landslides in  
 163 different areas or with different types, and we chose the one developed by Parker et al. (2011) in the  
 164 same study area. Some of some rock avalanches with detailed field investigation are replaced by the  
 165 data from published literature. The parameters of 38 rock avalanches are listed in Table 1.

### 166 3.3 Method

167 Travel distance is the most desirous prediction in rock-avalanche hazard evaluation in mountainous  
 168 areas. Travel distance prediction of rock avalanche is a complicated issue as it is determined by many  
 169 different properties of the materials (i.e., grain size distribution and water content), topographical  
 170 factors, mobility mechanics of failed mass, the confinement attributes of travel path, and so on (Guo et

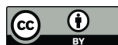

al., 2014). Empirical-statistical methods have long been used as tools to study the mobility of rock avalanche since they are easy to develop and apply, and they are not dependent on knowing the physical processes involved in causing the mobilized channelized rock avalanches have unique movement paths involving complex, and possibly little-known physical processes such as grain collisions, fragmentation and entrainment of bed material from the channel sides and bottom. Existing empirical models have not produced a favourable prediction. The forecasting index system and the prediction model of channelized rock avalanches should be discussed first.

In this paper, we first selected controlling factors on rock avalanche travel distance through correlation analysis. Then we fitted a stepwise multivariate regression model using all significant correlation variables to obtain a best-fit empirical model for landslide travel distance, and explored which factors were statistically significant at the same time, as expressed in equation (1).

$$y = b_0 + b_1x_1 + b_2x_2 + b_3x_3 + \dots + b_nx_n + \varepsilon \quad (1)$$

where  $y$  is the predictant ('dependent variable'), e.g. travel distance of rock avalanche ( $i = 1, 2, \dots, n$ ) are the predictors ('independent variables'),  $b_0$  is the intercept,  $b_i$  ( $i = 1, 2, \dots, n$ ) are the regression coefficients of the corresponding  $x_i$ , and  $\varepsilon$  is the residual error, here assumed to be independently and normally distributed. Predictors were added to the regression equation one at a time until there was no significant improvement in parsimonious fit as determined by the adjusted  $R^2$ .

## 4 Results and validation

### 4.1 Relationships between travel distance and volume, topographic relief of rock avalanche

Correlation coefficients between different variables and travel distance ( $L$ ) were calculated first, generating the correlation coefficients matrix shown in Table 2. The significant relevant predictors with the 95% confidence for travel distance prediction of channelized rock avalanche are landslide area ( $A$ ), landslide volume ( $V$ ), total relief ( $H_t$ ), source area height ( $H_s$ ), and channel angle ( $\beta$ ), with correlation coefficient of 0.877, 0.866, 0.857, 0.675, -0.467, respectively.

Figure 4 illustrates that the travel distance ( $L$ ) varies exponentially with volume ( $V$ ) of rock avalanche with an exponential exponent of 0.377. Compared with a compilation of world-wide rock-avalanche data (Legros, 2002), the mobility of rock avalanches in our study area is stronger than other non-volcanic landslides (power exponent 0.25), but weaker than volcanic landslides and debris flows

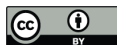

(both power exponent is 0.39). The relation between travel distance ( $L$ ) and total relief ( $H$ ) is shown in figure 5. The result suggests that the mobility (travel distance) of rock avalanche has relatively strong linear relationship with total relief ( $H$ ). The scale factor is close to 2.4, which means that the apparent friction coefficient ( $H/L$ ) for the rock avalanches is approximately 0.42. This is significantly lower than the commonly observed static coefficient of friction of rock material ( $\sim 0.6$ ).

#### 4.2 Multivariate regression model of rock avalanche travel distance

According to the matrix of correlation coefficients (Table 2), the slope angle ( $\alpha$ ) does not have a significant correlation with travel distance ( $L$ ) at the 95% confidence level. Thus this variable could be excluded first during development of the best-fit regression model for travel distance prediction. Prior to the landslide area ( $A$ ), the landslide volume ( $V$ ) has been considered in the models as it has much more physical meaning. In the end, a stepwise linear multivariate regression technique was applied to find the best-fit travel distance regression model using the significant relevant predictors including landslide volume ( $V$ ), total relief ( $H$ ), source area height ( $H_s$ ) and channel angle ( $\beta$ ). The best-fit regression equation for travel distance prediction were derived from the dataset of Table 1 (see equation (2)), and the coefficient of the variables with 95% confidence are shown in Table 3.

$$\log(L) = 0.420 + 0.079 \log(V) + 0.718 \log(H) - 0.361 \log(\tan \beta) \quad (2)$$

Where  $\log$  is the logarithm of 10;  $L$  is the predicted travel distance (m);  $V$  is the landslide volume ( $\text{m}^3$ );  $H$  is the total relief (m);  $\beta$  is the mean gradient of the channel ( $^\circ$ ).

Equation (2) can be transformed to equation (3):

$$L = 2.630 V^{0.079} H^{0.718} (\tan \beta)^{-0.365}$$

The best-fit travel distance regression equation indicates that the travel distance of channelized rock avalanche is positively correlated with landslide scale (landslide volume) and potential energy loss (total relief), and negatively correlated with channel gradient (channel angle), which is coherent with the results of correlation analysis in table 2.

While the total relief ( $H$ ) will be unknown prior to landslide occurrence, the elevation difference of source area will be available through specific field investigation on a potential rock avalanche area.

Hence, we introduced  $H_s$  and  $\alpha$  in replacement of  $H$  to the regression model as they have relative high correlation with  $H$  (correlation coefficients are 0.801 and 0.49 respectively). The transformed





alternative regression equation is given as equation (4) with the coefficient of the variables with 95% confidence in table 3.

$$L = 3.6V^{0.303}H_s^{0.244}(\tan \alpha)^{-0.115}(\beta)^{0.072} \quad (4)$$

Where L is the predicted travel distance (m); V is the landslide volume (m<sup>3</sup>); H<sub>s</sub> is the height of source area (m); α is the mean angle of slope segment (°); β is the mean gradient of the channel segment (°).

The validity of these two models were evaluated through the significance test leading to the highest R<sup>2</sup> value and the lowest residual standard error. Table 3 shows the significance values for the prediction model equations. Adjusted R<sup>2</sup> means adjusted multiple correlation coefficient, which represents the correlation level between the dependent variable and the independent variables. The calculation of adjusted R<sup>2</sup> considers the number of variables and can be used to compare goodness of fit of different regression models. Adjusted R<sup>2</sup> of the two regression equations are high, suggesting that the constructed regression models are reliable. The adjusted R<sup>2</sup> of equation (4) is higher than equation (2), implying a higher precision for the best-fit regression model. The significance test results on the regression equation suggest the significance of multiple regression equations ((F=173.5> F<sub>0.05</sub>(2.883) for equation (2) and F=49.5> F<sub>0.05</sub>(2.659) for equation (4)). Figures 6 and 7 show the distributions of the residuals in relation to the observed travel distance estimated by using equation (2) and (4). Both plots illustrates normality, constant variance and absence of trends in the residuals.

Figure 8 compares the predicted travel distances estimated by using equations (2) and (4) with the observed ones. It suggests that the predicted values of the samples are close to the observed ones. Where L exceeds 2000 m, the predicted travel distance calculated by using two models are lower than actual one, with relatively large residual error. The largest residual error appears in Wenjia gully rock avalanche, followed by Hongshi Gully, Niumian Gully and Donghekou rock avalanche. According to the field investigation, projected motion was experienced for these four rock avalanches with vertical drop of 260 m, 150 m, 60 m and 160 m respectively before they flowed along the channel downslope. Moreover, fluidization characteristics such as super-elevation near curve transitions can be found in the channel section of these four rock avalanches. These findings manifest the steep micro-geotopography will enlarge the mobility of rock avalanches as this kind of topography will lead the slide mass to undergo the projection, collision, fragmentation effects in the early motion stage which will facilitate



255 motion mode transformation from sliding to flowing. This transformation will enhance the motion  
 256 mobility of rock avalanche to travel a much longer distance than predicted one.

### 257 4.3 Validation

258 The regression equations were tested using an independent sample validation data set (Table 4) of 8  
 259 rock avalanches in the same area induced by three different kinds of triggers: 2008 M<sub>s</sub>7.8 Wenchuan  
 260 earthquake, 2013 M<sub>s</sub>7.0 Lushan earthquake, and heavy rainfall. The volume of these samples ranged  
 261 from  $8.8 \times 10^4$ – $150 \times 10^4 \text{ m}^3$ , and travel distance from 372–1372 m. The background parameters and the  
 262 predicted values of each avalanche are listed in Table 4. The relative errors between the predicted  
 263 values estimated by using equation (3) and observed values of the travel distance of the rock  
 264 avalanches,  $|L_{\text{predicted}} - L_{\text{observed}}| / L_{\text{observed}} \times 100\%$ , are between -14.4% and 17.2%, while the  
 265 relative errors are -44.0% and 17.9% for equation (4). On the whole, these two regression models  
 266 achieved acceptable prediction accuracy for preliminary forecasting of travel distance of rock  
 267 avalanches in rugged mountainous areas. The best-fit regression model appeared to provide greater  
 268 precision than the alternative model. Regarding the influence of triggers on the travel distance of the  
 269 channelized rock avalanches, those triggered by rainfall and the Lushan earthquake seemed to be more  
 270 mobile. It is inferred that the former difference is due to the high water content in failed mass induced  
 271 by rainfall. A possible reason why two rock avalanches triggered in the Lushan earthquake travelled  
 272 farther may be because of structural weakening of slope rock mass in the 2008 Wenchuan earthquake  
 273 in the study area.

## 274 5 Discussion

### 275 5.1 Prediction for travel distance of channelized rock avalanche

276 The results of our analysis of the data set, indicates that the mobility (travel distance) of channelized  
 277 rock avalanche is positively correlated with landslide volume and total relief but negatively correlated  
 278 with channel angle. It is inferred that the movement of channelized rock avalanche was strictly  
 279 constrained by the local geomorphology. As Figure 5 shows, the travel distance of channelized rock  
 280 avalanche would rapidly increase with volume of rock avalanche enlarged. Such a high correlation  
 281 between landslide volume and travel distance implies that the travel distance of channelized rock  
 282 avalanche is dominated by the spreading of the slide mass (Davies, 1982; Staron, 2009). The high



283 positive correlation between total relief and travel distance is for two reasons: **the larger the total relief**  
 284 **is, the more kinetic energy the slide mass could obtained and the further distance could it travel.**

285 another contribution is the geometrical similarity of hillslope geomorphology in the study area (Legros,  
 286 2002).

287 Regarding the **medium negative correlation** between travel distance and channel angle, it is inferred  
 288 that when the slide mass rushed into the channel after the acceleration movement on the upper hillslope,  
 289 it had relatively high velocity and extremely low frictional coefficient among the rock fragments, and  
 290 the channel could not stop the rock avalanche **until it lost fragment flow discharge.** Hence, the travel  
 291 distance of channelized rock avalanche would increase with the channel angle cut down given the same  
 292 **flow discharge (landslide volume), relative stable flow velocity,** and similar flow capacity. However, it  
 293 is still difficult to evaluate the flow capacity of the channels due to difficulty of quantifying its cross-  
 294 section shape (width and depth of channels), resistance to the rock avalanche and even the shape  
 295 changing induced by entrainment process of rock avalanche.

296 The residual analysis result demonstrates that the projection process in the early motion stage will  
 297 significantly enlarge the travel distance of rock avalanches. The nature of this phenomenon is  
 298 suggested to be involved with transformation of motion mode from sliding to flowing due to collision  
 299 and fragmentation effects after the projection (Davies et al, 1999). Furthermore, the degree of  
 300 fragmentation of failed mass should have remarkable influence on the travel distance of rock avalanche,  
 301 and other factors changing the fragmentation degree should be further study, such as earthquake effect,  
 302 geologic structure and rock type.

## 303 5.2 Conceptual model for transportation of channelized rock avalanche

304 The statistical results imply that the travel distance of channelized rock avalanche is highly correlated  
 305 with landslide volume, total relief and channel angle. As the **total relief** and channel angle act as  
 306 external factors for the motion of rock avalanche, it seems like it is in essence landslide volume that  
 307 control the rock avalanche movement. Actually, a good fitting result between travel distance and  
 308 landslide volume appears on our data set (Figure 4). So we propose a conceptual model for channelized  
 309 rock avalanche transportation: An initial failed mass rushes into the channel with certain velocity after  
 310 acceleration and fragmentation effects over the upper slope. Then the failed mass will “forget” the  
 311 initial fall height and flow down in the channel like unsteady flow. The flow discharge (including



312 initial landslide volume and entrainment (initial volume) and the flow capacity of the channel control the  
 313 travel distance of channelized rock avalanche without considering the motion mechanism.  
 314 However, the flow capacity varies along the channel. Some local depression can store a mass of the  
 315 moving rock debris, causing a lack of flow discharge for the downstream channel and a considerable  
 316 decrease of travel distance. Taking Wenjia Gully rock avalanche for an example, almost a half of total  
 317 volume of the landslide deposited on the beginning of the channel (red dash circle area in Figure 9),  
 318 leading to that the distal deposition appeared in the channel instead of the valley. Thus assessing the  
 319 flow capacity of the channel for rock avalanche motion will assist in future forecast of potential rock  
 320 avalanche hazard in mountainous areas.

## 321 6 Conclusion

322 Channelized rock avalanche refers to a rock avalanche with a flow path confined between valley walls.  
 323 Relevant Detailed data on thirty-eight channelized rock avalanches triggered by Wenchuan earthquake  
 324 were collected by remote sensing, field investigation and literature review. The results of correlation  
 325 and regression analysis revealed that the movement of channelized rock avalanches is dominated by  
 326 spreading of the failed mass. Landslide volume ( $V$ ), total relief ( $H$ ) and channel angle ( $\beta$ ) had  
 327 predominant effects played a dominating role in the on travel distance of channelized rock avalanches.  
 328 Stepwise multivariate regression was used to develop a nonlinear best-fit travel distance prediction  
 329 model for the channelized rock avalanches. An alternative multivariate regression model was also built.  
 330 The reliability of the two models was tested on by an independent validation dataset of 8 rock  
 331 avalanches in the same area and produced good results, meeting the requirements for preliminary  
 332 evaluation of travel distance for channelized rock avalanches in the Wenchuan earthquake area.

## 333 Acknowledgement

334 This work was supported by the Young Scientists Fund of the National Natural Science Foundation of  
 335 China (Grant No. 41302241), the Fund for Creative Research Groups of China (Grant No. 41521002),  
 336 the Fund for International Cooperation (NSFC-RCUK\_NERC), Resilience to Earthquake-induced  
 337 landslide risk in China (Grant No. 41661134010). The authors thank Dr. Mauri McSaveney for his  
 338 constructive comments and editing the English the paper.

339

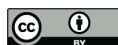

## 340    **References**

- 341    Davies, T. R., McSaveney, M. J., and Hodgson, K. A.: A fragmentation-spreading model for long-  
 342    runout rock avalanches, *Canadian Geotechnical Journal*, 36, 1096-1110, 1999.
- 343    Fan, X., Rossiter, D. G., Westen, C. J., Xu, Q., and Görtin, T.: Empirical prediction of coseismic  
 344    landslide dam formation, *Earth Surface Processes and Landforms*, 39, 1913-1926, 2014.
- 345    Finlay, P. J., Mostyn, G. R., and Fell, R.: Landslide risk assessment: prediction of travel distance,  
 346    *Canadian Geotechnical Journal*, 36, 556-562, 1999.
- 347    Guo, D., Hamada, M., He, C., Wang, Y., and Zou, Y.: An empirical model for landslide travel distance  
 348    prediction in Wenchuan earthquake area, *Landslides*, 11, 281-291, 2014.
- 349    Heim, A.: *Bergsturz und menschenleben* (No. 20), Fretz and Wasmuth, 1992.
- 350    Hungr, O., Evans, S. G., Bovis, M. J., and Hutchinson, J. N.: A review of the classification of  
 351    landslides of the flow type, *Environmental and Engineering Geoscience*, 7, 221-238, 2001.
- 352    Hungr, O., and McDougall, S.: Two numerical models for landslide dynamic analysis, *Computers and*  
 353    *Geosciences*, 35, 978-992, 2009.
- 354    Hungr, O., Leroueil, S., and Picarelli, L.: The Varnes classification of landslide types, an update,  
 355    *Landslides*, 11, 167-194, 2014.
- 356    Hsü K J.: Catastrophic debris streams (sturzstroms) generated by rockfalls, *Geological Society of*  
 357    *America Bulletin*, 86, 129-140, 1975.
- 358    Legros, F.: The mobility of long-runout landslides, *Engineering Geology*, 63, 301-331, 2002.
- 359    Lied, K., and Bakkehoi, S.: Empirical calculations of snow-avalanche run-out distance based on  
 360    topographic parameters, *Journal of Glaciology*, 26, 165-177, 1980.
- 361    Lo, C. M., Lin, M. L., Tang, C. L., and Hu, J. C.: A kinematic model of the Hsiaolin landslide  
 362    calibrated to the morphology of the landslide deposit. *Engineering Geology*, 123, 22-39, 2011.
- 363    Nicoletti, P. G., and Sorriso-Valvo, M.: Geomorphic controls of the shape and mobility of rock  
 364    avalanches, *Geological Society of America Bulletin*, 103, 1365-1373, 1991.
- 365    Parker, R. N., Densmore, A. L., Rosser, N. J., De Michele, M., Li, Y., Huang, R., ... and Petley, D. N:  
 366    Mass wasting triggered by the 2008 Wenchuan earthquake is greater than orogenic growth, *Nature*  
 367    *Geoscience*, 4, 449-452, 2011.



- 368 Pastor, M., Haddad, B., Sorbino, G., Cuomo, S., and Drempetic, V.: A depth - integrated, coupled SPH  
 369 model for flow - like landslides and related phenomena, *International Journal for numerical and*  
 370 *analytical methods in geomechanics*, 33, 143-172, 2009.
- 371 Qi, S., Xu, Q., Zhang, B., Zhou, Y., Lan, H., and Li, L.: Source characteristics of long runout rock  
 372 avalanches triggered by the 2008 Wenchuan earthquake, China, *Journal of Asian Earth Sciences*, 40,  
 373 896-906, 2011.
- 374 Sassa, K.: Geotechnical model for the motion of landslides, In: AA Balkema (ed.) *Proceedings of the*  
 375 *5th International Symposium on Landslide*, Rotterdam, 37-55, 1988.
- 376 Scheidegger, A. E.: On the prediction of the reach and velocity of catastrophic landslides, *Rock*  
 377 *Mechanics and Rock Engineering*, 5, 231-236, 1973.
- 378 Staron, L., and Lajeunesse, E.: Understanding how volume affects the mobility of dry debris flows,  
 379 *Geophysical Research Letters*, 36, 2009.
- 380 Van Westen, C. J., Van Asch, T. W., and Soeters, R.: Landslide hazard and risk zonation—why is it  
 381 still so difficult?, *Bulletin of Engineering geology and the Environment*, 65, 167-184, 2006.
- 382 Xu, Q., Pei, X. J., and Huang, R. Q.: Large-scale landslides induced by the Wenchuan earthquake.  
 383 *Science*, Beijing, 2009 (In Chinese).
- 384 Yu, H., Wang, D., Yang, Y., Xie, Q., Jiang, W., and Zhou, B.: The preliminary analysis of strong  
 385 ground motion records from the M<sub>s</sub> 8.0 Wenchuan Earthquake, *Journal of Earthquake Engineering*  
 386 *and Engineering Vibration*, 1, 000, 2009.
- 387 Zhang, M., and Yin, Y.: Dynamics, mobility-controlling factors and transport mechanisms of rapid  
 388 long-runout rock avalanches in China, *Engineering Geology*, 167, 37-58, 2013.
- 389  
 390



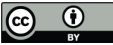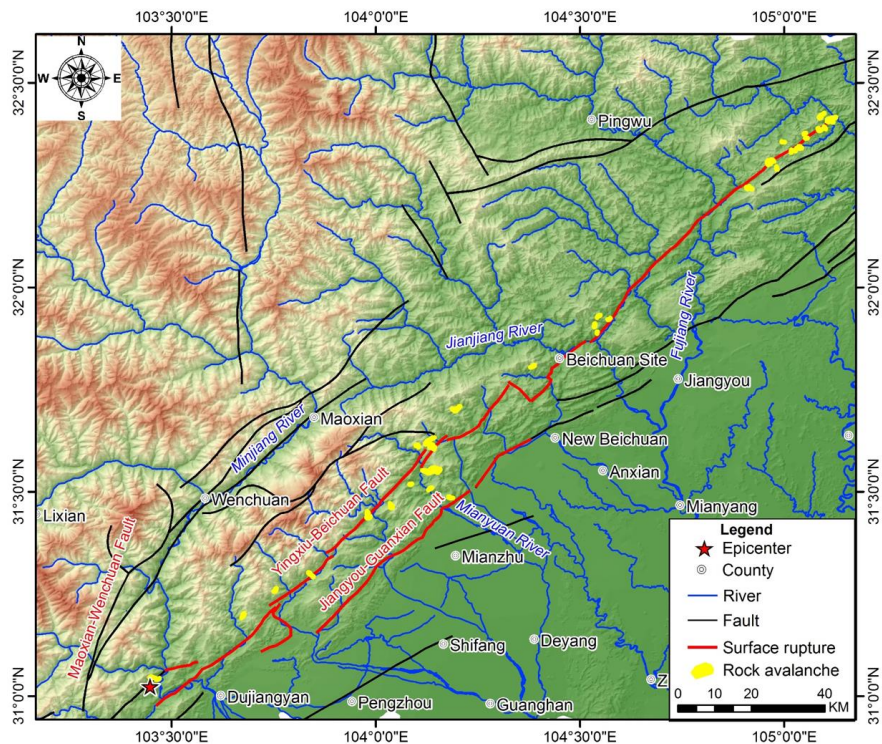

Figure 1: Distribution map of large rock avalanches triggered by the Wenchuan earthquake.

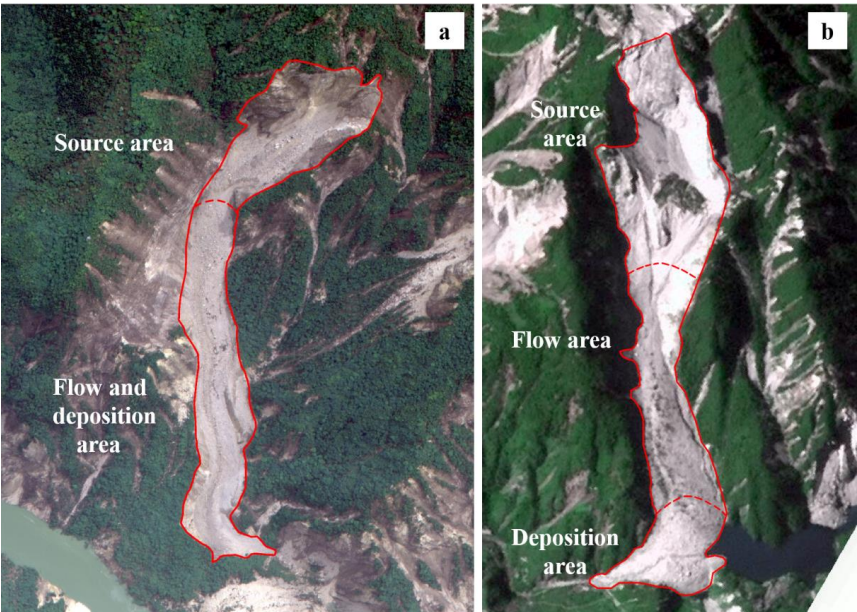



395 Figure 2: Remote-sensing images of two channelized rock avalanches triggered by the Wenchuan  
 396 earthquake. a is Changtan rock avalanche (No.21 in table 1); b is Laoyingyan rock avalanche, which is  
 397 river-blocked.

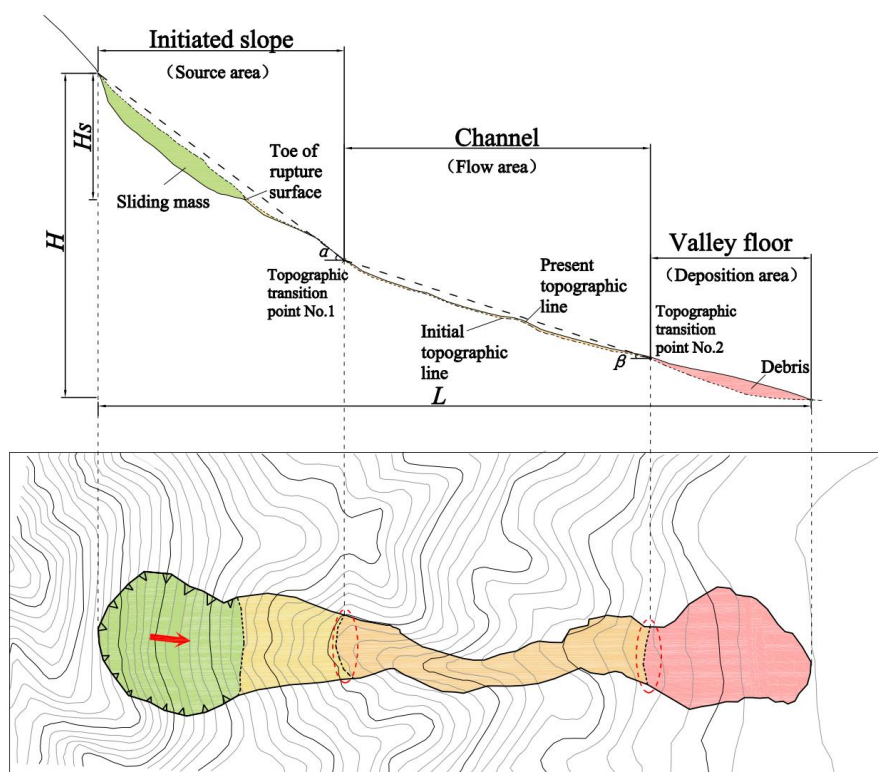

398  
 399 Figure 3: Sketch map of a channelized rock avalanche defining geometric parameters. The red-dashed  
 400 ellipse indicates the topographic transition dividing the initiated slope, channel and valley floor. The red  
 401 arrow represents sliding direction of source mass.



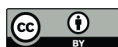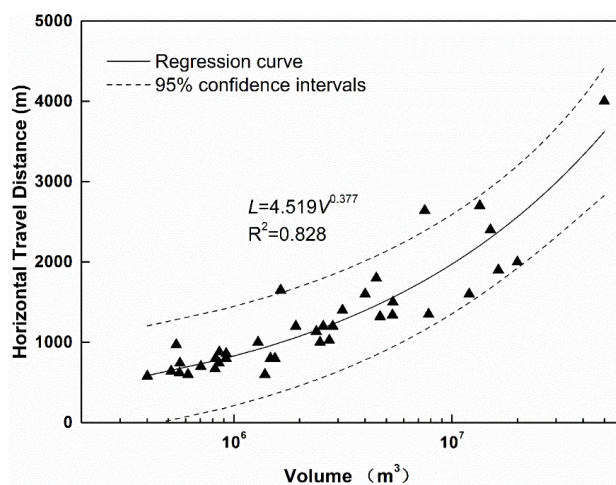

Figure 4: Relationship between horizontal travel distance and volume of channelized rock avalanches.

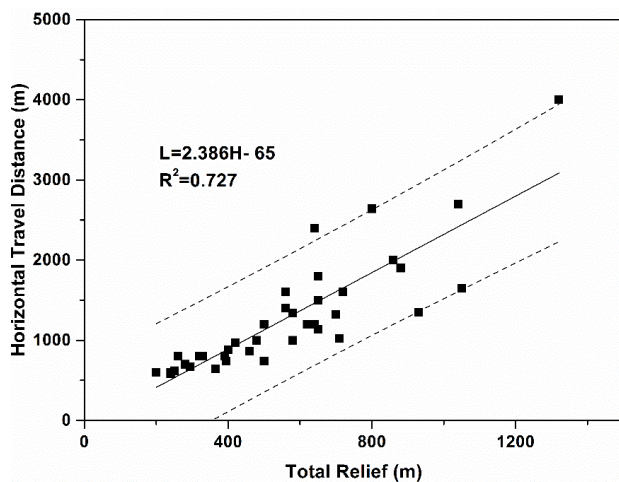

Figure 5: Relationship between horizontal travel distance and total relief of channelized rock avalanche.

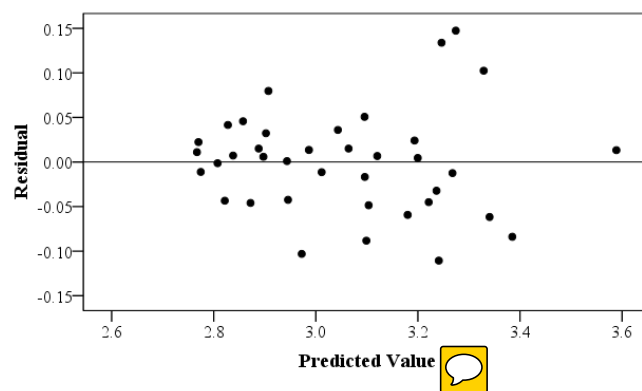

Figure 6: Residual plot for equation (2).

404

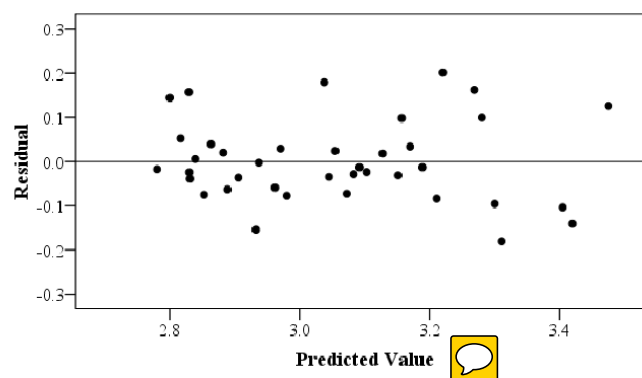

Figure 7: Residual plot for equation (4).

405

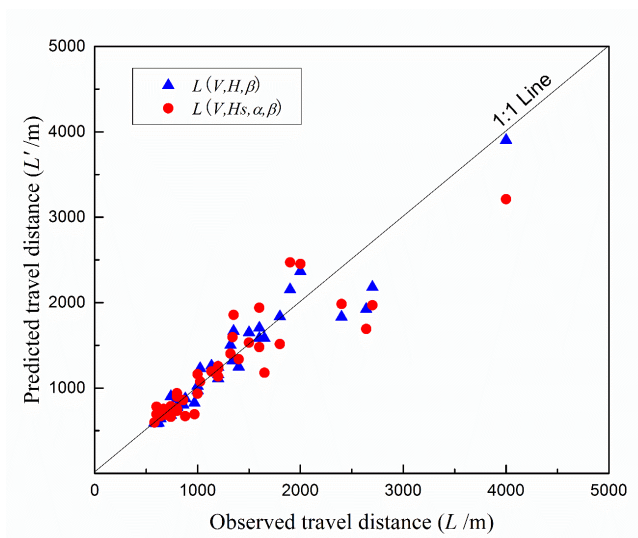

**Figure 8:** The comparison between observed and predicted travel distance for the two multivariate regression models.

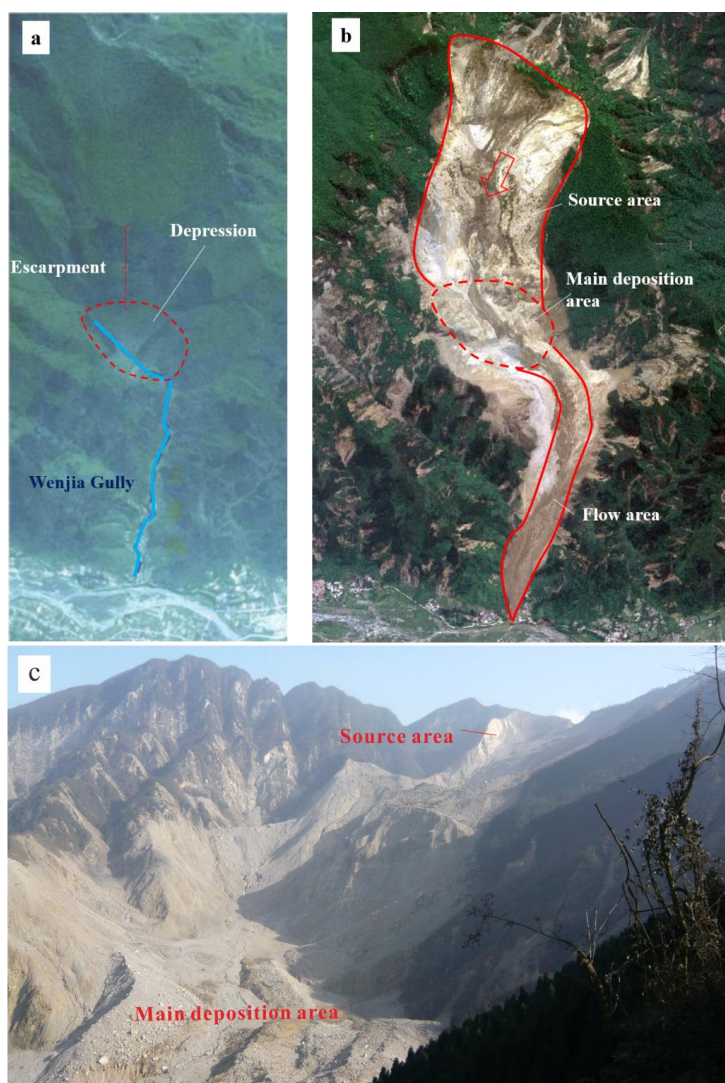

406

407 **Figure 9: Sketch map of flow capacity of channel affecting on the travel distance of Wenjia Gully**  
 408 **channelized rock avalanche: (a) before the earthquake, (b) after the earthquake, (c) photo taken on**  
 409 **deposition platform after the earthquake. The red arrow show the sliding direction of source mass. The red**  
 410 **dotted line in figure.9(a) indicates the original depression on the travel path of the rock avalanche, in where**  
 411 **debris deposition of about 30 million m<sup>3</sup> was stored after the earthquake (shown in figure.9(b)), and more**  
 412 **detailed information is shown in the figure.9(c).**

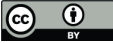

Table 1: Data of various factors for establishment of prediction model of rock avalanche travel distance.

| Code | Landslide name | Longitude,<br>(°E) | Latitude,<br>(°N) | Landslide<br>area,<br>$A$ ( $m^2$ ) | Landslide<br>volume,<br>$V$ ( $m^3$ ) | Source<br>area<br>height,<br>$H_s$ (m) | Slope<br>angle,<br>$\alpha$ (°) | Channel<br>angle,<br>$\beta$ (°) | Total<br>relief,<br>$H$<br>(m) | Travel<br>distance,<br>$L$ (m) | Reference       |
|------|----------------|--------------------|-------------------|-------------------------------------|---------------------------------------|----------------------------------------|---------------------------------|----------------------------------|--------------------------------|--------------------------------|-----------------|
| 1    | Wenjia Gully   | 104.140            | 31.552            | 3000566                             | 50000000                              | 440                                    | 26                              | 7                                | 1320                           | 4000                           | Xu et al., 2009 |
| 2    | Shuimo Gully   | 103.981            | 31.442            | 915608                              | 19960000                              | 490                                    | 35                              | 10                               | 860                            | 2000                           |                 |
| 3    | Dawuji         | 104.196            | 31.702            | 792190                              | 16330000                              | 540                                    | 29                              | 13                               | 880                            | 1900                           |                 |
| 4    | Donghekou      | 105.113            | 32.410            | 1283627                             | 15000000                              | 240                                    | 25                              | 11                               | 640                            | 2400                           | Xu et al., 2009 |
| 5    | Hongshigou     | 104.130            | 31.624            | 687520                              | 13410000                              | 290                                    | 37                              | 17                               | 1040                           | 2700                           |                 |
| 6    | Woqian         | 104.964            | 32.308            | 695672                              | 12000000                              | 330                                    | 30                              | 10                               | 560                            | 1600                           | Xu et al., 2009 |
| 7    | Xiaoliashan    | 104.038            | 31.465            | 465899                              | 7810000                               | 480                                    | 48                              | 24                               | 930                            | 1350                           |                 |
| 8    | Niumian Gully  | 103.456            | 31.044            | 527700                              | 7500000                               | 320                                    | 32                              | 13                               | 800                            | 2640                           | Xu et al., 2009 |
| 9    | Liqi Gully     | 105.207            | 32.169            | 355113                              | 5360000                               | 360                                    | 37                              | 12                               | 650                            | 1500                           |                 |
| 10   | Caocaoping     | 104.139            | 31.607            | 354046                              | 5340000                               | 345                                    | 31                              | 17                               | 580                            | 1340                           |                 |
| 11   | Huoshi Gully   | 104.134            | 31.616            | 322155                              | 4680000                               | 270                                    | 38                              | 17                               | 700                            | 1320                           |                 |
| 12   | Shibangou      | 105.090            | 32.419            | 496983                              | 4500000                               | 450                                    | 34                              | 9                                | 650                            | 1800                           | Xu et al., 2009 |
| 13   | Xiejadianzi    | 103.841            | 31.298            | 294256                              | 4000000                               | 400                                    | 34                              | 15                               | 720                            | 1600                           | Xu et al., 2009 |
| 14   | Dashui Gully   | 103.675            | 31.199            | 241874                              | 3150000                               | 320                                    | 30                              | 17                               | 560                            | 1400                           |                 |
| 15   | Changping      | 103.754            | 31.259            | 224645                              | 2840000                               | 290                                    | 37                              | 16                               | 500                            | 1200                           |                 |
| 16   | Xiaomuling     | 104.102            | 31.613            | 218704                              | 2740000                               | 175                                    | 45                              | 26                               | 710                            | 1025                           |                 |
| 17   | Baishuling     | 104.385            | 31.807            | 208968                              | 2570000                               | 335                                    | 36                              | 20                               | 620                            | 1200                           |                 |
| 18   | Dawan          | 104.536            | 31.907            | 203959                              | 2480000                               | 220                                    | 28                              | 20                               | 480                            | 1000                           |                 |
| 19   | Xiaoliashan    | 104.182            | 31.486            | 198165                              | 2385499                               | 340                                    | 44                              | 20                               | 650                            | 1135                           |                 |
| 20   | Shicouzi       | 104.918            | 32.243            | 169540                              | 1920000                               | 260                                    | 30                              | 26                               | 640                            | 1200                           |                 |



|    |                |         |        |        |         |     |    |    |      |      |
|----|----------------|---------|--------|--------|---------|-----|----|----|------|------|
| 21 | Changtan       | 104.133 | 31.508 | 151094 | 1640000 | 400 | 33 | 25 | 1050 | 1650 |
| 22 | Hongmagong     | 104.962 | 32.301 | 144683 | 1540000 | 195 | 30 | 14 | 330  | 800  |
| 23 | Baiguocun      | 105.088 | 32.385 | 139800 | 1470000 | 165 | 26 | 12 | 260  | 800  |
| 24 | Qinglongcun    | 105.036 | 32.342 | 134079 | 1390000 | 90  | 21 | 11 | 200  | 600  |
| 25 | Pengjiashan    | 104.546 | 31.930 | 127156 | 1290000 | 200 | 33 | 28 | 580  | 1000 |
| 26 | Longwancun     | 104.571 | 31.922 | 99821  | 920000  | 205 | 31 | 28 | 460  | 860  |
| 27 | Zhangzhengbo   | 105.017 | 32.333 | 99726  | 920000  | 125 | 29 | 15 | 320  | 800  |
| 28 | Dujiayan       | 105.028 | 32.336 | 94769  | 860000  | 100 | 33 | 17 | 400  | 880  |
| 29 | Madiping       | 104.996 | 32.355 | 94632  | 860000  | 140 | 27 | 31 | 395  | 740  |
| 30 | Yandiaowo      | 105.099 | 32.391 | 92128  | 820000  | 145 | 30 | 26 | 390  | 800  |
| 31 | Chuangzi Gully | 104.085 | 31.518 | 91717  | 820000  | 185 | 35 | 15 | 295  | 670  |
| 32 | Zhaoliashan    | 105.041 | 32.342 | 82329  | 700000  | 115 | 22 | 16 | 280  | 700  |
| 33 | Weiziping      | 105.083 | 32.387 | 74661  | 620000  | 135 | 22 | 18 | 240  | 600  |
| 34 | Maochongshan 2 | 104.908 | 32.243 | 70251  | 570000  | 160 | 38 | 22 | 500  | 740  |
| 35 | Waqianshan     | 105.049 | 32.376 | 70007  | 560000  | 135 | 24 | 18 | 250  | 620  |
| 36 | Muhongping     | 104.982 | 32.291 | 68288  | 540000  | 175 | 28 | 20 | 420  | 970  |
| 37 | Dapingshang    | 104.542 | 31.889 | 65700  | 520000  | 160 | 34 | 29 | 365  | 640  |
| 38 | Liushuping 2   | 105.054 | 32.365 | 54810  | 400000  | 150 | 29 | 16 | 240  | 580  |



Table 2: Correlation coefficients of continuous variables listed in Table 1.

|          | A     | V     | H     | Hs    | $\alpha$ | $\beta$ | L      |
|----------|-------|-------|-------|-------|----------|---------|--------|
| A        | 1.000 | 0.982 | 0.674 | 0.521 | -0.119   | -0.524  | 0.877  |
| V        | —     | 1.000 | 0.713 | 0.560 | -0.055   | -0.492  | 0.866  |
| H        | —     | —     | 1.000 | 0.801 | 0.429    | -0.130  | 0.857  |
| Hs       | —     | —     | —     | 1.000 | 0.399    | -0.323  | 0.675  |
| $\alpha$ | —     | —     | —     | —     | 1.000    | 0.264   | 0.082  |
| $\beta$  | —     | —     | —     | —     | —        | 1.000   | -0.467 |
| L        | —     | —     | —     | —     | —        | —       | 1.000  |

Note: The number in Italics indicates the two variables are not significantly correlated

Table 3: The regression coefficients and results of significance tests of two multivariate regression models.

| Equations                       | Coefficients* | Intercept | Coefficient of log(V) | Coefficient of log(H) | Coefficient of log(tan $\beta$ ) | Coefficient of log(Hs) | Coefficient of log(tan $\beta$ ) | Adjusted R <sup>2</sup> | F-stat | F <sub>0.05</sub> |
|---------------------------------|---------------|-----------|-----------------------|-----------------------|----------------------------------|------------------------|----------------------------------|-------------------------|--------|-------------------|
| Best-fit regression equation    | LCI           | 0.175     | -0.013                | 0.521                 | -0.548                           | —                      | —                                | —                       | —      | —                 |
|                                 | Mean          | 0.420     | 0.079                 | 0.718                 | -0.365                           | —                      | —                                | 0.933                   | 173.5  | 2.883             |
|                                 | UCI           | 0.665     | 0.171                 | 0.914                 | -0.182                           | —                      | —                                | —                       | —      | —                 |
| Alternative regression equation | LCI           | 0.110     | 0.199                 | —                     | -0.165                           | -0.002                 | -0.464                           | —                       | —      | —                 |
|                                 | Mean          | 0.561     | 0.303                 | —                     | 0.072                            | 0.244                  | -0.115                           | 0.840                   | 49.5   | 2.659             |
|                                 | UCI           | 1.012     | 0.407                 | —                     | 0.308                            | 0.489                  | 0.233                            | —                       | —      | —                 |

5 Note: “Coefficients” of each variable has three kinds: LCI is lower bound of the coefficients with 95% confidence; Mean is the mean value of the coefficients; UCI is upper bound of the coefficients with 95% confidence;

Table 4: Background parameters and predicted values of 8 rock avalanches in the same area used for validation

| Landslide name | Longitude | Latitude | Triggers* | V /10 <sup>4</sup> m <sup>3</sup> | $\alpha$ /° | B /° | Hs /m | H /m | L /m | L' (3)** /m | Error /% | L' (4)*** /m | Error /% |
|----------------|-----------|----------|-----------|-----------------------------------|-------------|------|-------|------|------|-------------|----------|--------------|----------|
| Pianqiaozi     | 104.370   | 31.822   | WCEQ      | 8.8                               | 35          | 19   | 153   | 205  | 372  | 436         | 17.2     | 373          | 0.3      |
| Yangjiayan     | 104.328   | 31.755   | WCEQ      | 25.4                              | 41          | 23   | 164   | 304  | 518  | 583         | 12.5     | 518          | 0.1      |
| Shanshulin     | 103.508   | 31.181   | WCEQ      | 27.9                              | 34          | 25   | 340   | 433  | 715  | 731         | 2.3      | 660          | -7.6     |
| Fuyangou       | 103.501   | 31.422   | WCEQ      | 71.9                              | 38          | 28   | 385   | 530  | 763  | 869         | 13.8     | 900          | 17.9     |

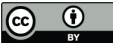

|            |         |        |      |     |    |    |     |     |      |      |       |     |       |
|------------|---------|--------|------|-----|----|----|-----|-----|------|------|-------|-----|-------|
| Dayanbeng1 | 102.762 | 30.179 | LSEQ | 100 | 53 | 10 | 254 | 424 | 1267 | 1136 | -10.3 | 781 | -38.4 |
| Dayanbeng2 | 102.761 | 30.178 | LSEQ | 110 | 50 | 8  | 237 | 407 | 1372 | 1208 | -12.0 | 787 | -42.6 |
| Ermanshan  | 102.739 | 29.322 | RF   | 100 | 33 | 15 | 148 | 635 | 1370 | 1303 | -4.9  | 767 | -44.0 |
| Wulipo     | 103.567 | 30.919 | RF   | 150 | 30 | 10 | 135 | 377 | 1260 | 1078 | -14.4 | 833 | -33.9 |

Note: “Triggers” is the triggering condition of rock avalanches: “WCEQ” represents the 2008 Wenchuan Ms7.8 earthquake;  
“LSEQ” represents the 2013 Lushan Ms7.0 earthquake; “RF” represents the rock avalanche was induced by heavy rainfall.  
 $L'_{(3)}$ ,  $L'_{(4)}$  indicates the predicted travel distance estimated by using equation (3) and (4) respectively.
